# Supplementary figures and images for: Comprehensive Assessment of the Dynamics of Banana Chilling Injury by Advanced Optical Techniques
Source: MDPI journal article supplement (doi:10.3390/app112311433), 2021-12-02

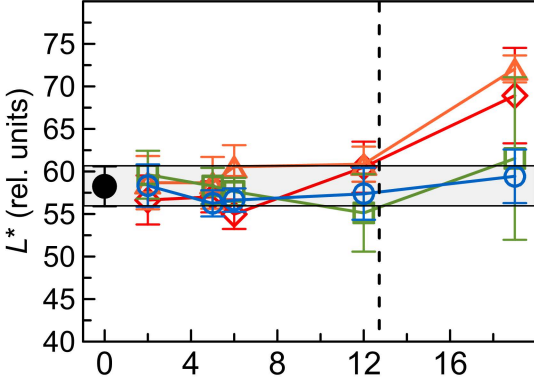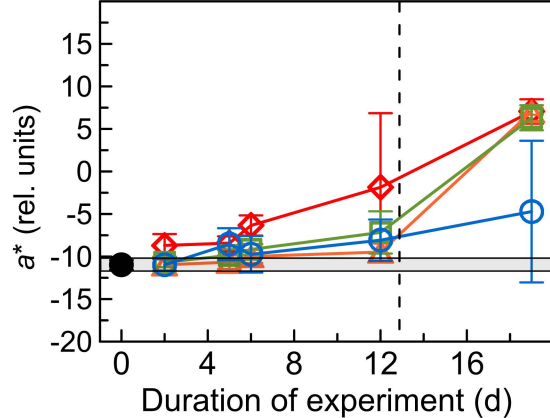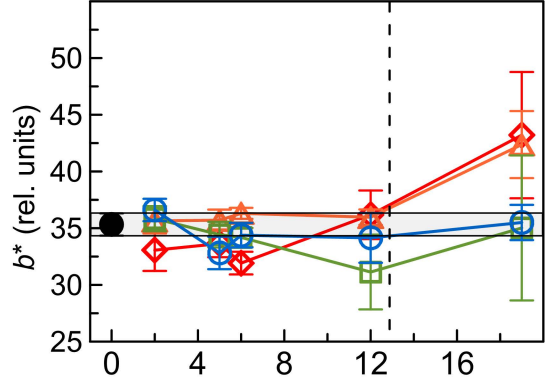

Supplement: s1 [file s1]
